# Supplementary material for: Race- and Gender-Specific Associations between Neighborhood-Level Socioeconomic Status and Body Mass Index: Evidence from the Southern Community Cohort Study
Source: MDPI journal article supplement (doi:10.3390/ijerph20237122), 2023-11-30
Supplement: s1 [file s1]

## Supplemental Tables.

| Table S1. Associations between Obese Status and Neighborhood Deprivation, stratified by sex and race, among SCCS at baseline interview, 2002-2009                          |                                  |                       |                          |                                  |                       |                          |                                  |                       |                          |                                  |                       |                          |
|----------------------------------------------------------------------------------------------------------------------------------------------------------------------------|----------------------------------|-----------------------|--------------------------|----------------------------------|-----------------------|--------------------------|----------------------------------|-----------------------|--------------------------|----------------------------------|-----------------------|--------------------------|
| Deprivation Index <sup>a</sup>                                                                                                                                             | White                            |                       |                          |                                  |                       |                          | Black                            |                       |                          |                                  |                       |                          |
|                                                                                                                                                                            | Males                            |                       |                          | Females                          |                       |                          | Males                            |                       |                          | Females                          |                       |                          |
|                                                                                                                                                                            | N, "Healthy" weight <sup>b</sup> | N, Obese <sup>c</sup> | OR (95% CI) <sup>d</sup> | N, "Healthy" weight <sup>b</sup> | N, Obese <sup>c</sup> | OR (95% CI) <sup>d</sup> | N, "Healthy" weight <sup>b</sup> | N, Obese <sup>c</sup> | OR (95% CI) <sup>d</sup> | N, "Healthy" weight <sup>b</sup> | N, Obese <sup>c</sup> | OR (95% CI) <sup>d</sup> |
| Q1                                                                                                                                                                         | 465                              | 453                   | 1.0 (ref)                | 738                              | 720                   | 1.0 (ref)                | 235                              | 300                   | 1.0 (ref)                | 212                              | 695                   | 1.0 (ref)                |
| Q2                                                                                                                                                                         | 501                              | 759                   | 1.54<br>(1.28, 1.85)     | 883                              | 1624                  | 1.55<br>(1.34, 1.78)     | 425                              | 486                   | 0.91<br>(0.72, 1.15)     | 383                              | 1338                  | 1.04<br>(0.85, 1.27)     |
| Q3                                                                                                                                                                         | 488                              | 722                   | 1.45<br>(1.20, 1.76)     | 807                              | 1706                  | 1.71<br>(1.48, 1.98)     | 579                              | 645                   | 1.05<br>(0.84, 1.31)     | 381                              | 1787                  | 1.43<br>(1.18, 1.74)     |
| Q4                                                                                                                                                                         | 559                              | 781                   | 1.39<br>(1.15, 1.68)     | 812                              | 1845                  | 1.76<br>(1.52, 2.03)     | 1188                             | 1246                  | 1.00<br>(0.81, 1.23)     | 844                              | 3911                  | 1.42<br>(1.19, 1.69)     |
| Q5                                                                                                                                                                         | 576                              | 514                   | 1.03<br>(0.84, 1.25)     | 498                              | 1039                  | 1.64<br>(1.39, 1.93)     | 5282                             | 3698                  | 0.76<br>(0.63, 0.93)     | 3030                             | 10241                 | 1.15<br>(0.98, 1.36)     |
| <sup>a</sup> Neighborhood Deprivation Quintiles with Q1 being least deprived and Q5 being most deprived                                                                    |                                  |                       |                          |                                  |                       |                          |                                  |                       |                          |                                  |                       |                          |
| <sup>b</sup> "Healthy" weight defined by having a BMI within [18.5, 24.9]                                                                                                  |                                  |                       |                          |                                  |                       |                          |                                  |                       |                          |                                  |                       |                          |
| <sup>c</sup> Obese status defined by having a BMI ≥ 30                                                                                                                     |                                  |                       |                          |                                  |                       |                          |                                  |                       |                          |                                  |                       |                          |
| <sup>d</sup> Analyses adjusted for age, health insurance status, education, household income, smoking status, and enrollment source; OR=Odds Ratio; CI=Confidence Interval |                                  |                       |                          |                                  |                       |                          |                                  |                       |                          |                                  |                       |                          |
| Stratifications based on the significant likelihood ratio test for interaction by race (p-interaction<0.0001) and sex (p-interaction<0.0001)                               |                                  |                       |                          |                                  |                       |                          |                                  |                       |                          |                                  |                       |                          |

| Table S2. Associations between Overweight Status and Neighborhood Deprivation, stratified by sex and race, among SCCS at baseline interview, 2002-2009                     |                                  |                            |                          |                                  |                            |                          |                                  |                            |                          |                                  |                            |                          |
|----------------------------------------------------------------------------------------------------------------------------------------------------------------------------|----------------------------------|----------------------------|--------------------------|----------------------------------|----------------------------|--------------------------|----------------------------------|----------------------------|--------------------------|----------------------------------|----------------------------|--------------------------|
| Deprivation Index <sup>a</sup>                                                                                                                                             | White                            |                            |                          |                                  |                            |                          | Black                            |                            |                          |                                  |                            |                          |
|                                                                                                                                                                            | Males                            |                            |                          | Females                          |                            |                          | Males                            |                            |                          | Females                          |                            |                          |
|                                                                                                                                                                            | N, "Healthy" weight <sup>b</sup> | N, Overweight <sup>c</sup> | OR (95% CI) <sup>d</sup> | N, "Healthy" weight <sup>b</sup> | N, Overweight <sup>c</sup> | OR (95% CI) <sup>d</sup> | N, "Healthy" weight <sup>b</sup> | N, Overweight <sup>c</sup> | OR (95% CI) <sup>d</sup> | N, "Healthy" weight <sup>b</sup> | N, Overweight <sup>c</sup> | OR (95% CI) <sup>d</sup> |
| Q1                                                                                                                                                                         | 465                              | 670                        | 1.0 (ref)                | 738                              | 562                        | 1.0 (ref)                | 235                              | 393                        | 1.0 (ref)                | 212                              | 365                        | 1.0 (ref)                |
| Q2                                                                                                                                                                         | 501                              | 827                        | 1.30<br>(1.09, 1.54)     | 883                              | 956                        | 1.29<br>(1.11, 1.49)     | 425                              | 564                        | 0.85<br>(0.68, 1.05)     | 383                              | 662                        | 1.03<br>(0.83, 1.27)     |
| Q3                                                                                                                                                                         | 488                              | 734                        | 1.23<br>(1.04, 1.48)     | 807                              | 905                        | 1.31<br>(1.12, 1.53)     | 579                              | 708                        | 0.87<br>(0.71, 1.07)     | 381                              | 759                        | 1.22<br>(0.98, 1.51)     |
| Q4                                                                                                                                                                         | 559                              | 708                        | 1.08<br>(0.91, 1.29)     | 812                              | 946                        | 1.31<br>(1.12, 1.52)     | 1188                             | 1350                       | 0.82<br>(0.68, 0.99)     | 844                              | 1584                       | 1.15<br>(0.95, 1.40)     |
| Q5                                                                                                                                                                         | 576                              | 583                        | 1.03<br>(0.86, 1.24)     | 498                              | 568                        | 1.33<br>(1.12, 1.59)     | 5282                             | 4780                       | 0.73<br>(0.61, 0.87)     | 3030                             | 4534                       | 1.01<br>(0.84, 1.21)     |
| <sup>a</sup> Neighborhood Deprivation Quintiles with Q1 being least deprived and Q5 being most deprived                                                                    |                                  |                            |                          |                                  |                            |                          |                                  |                            |                          |                                  |                            |                          |
| <sup>b</sup> "Healthy" weight defined by having a BMI within [18.5, 24.9]                                                                                                  |                                  |                            |                          |                                  |                            |                          |                                  |                            |                          |                                  |                            |                          |
| <sup>c</sup> Overweight defined by having a BMI within [25, 29.9]                                                                                                          |                                  |                            |                          |                                  |                            |                          |                                  |                            |                          |                                  |                            |                          |
| <sup>d</sup> Analyses adjusted for age, health insurance status, education, household income, smoking status, and enrollment source; OR=Odds Ratio; CI=Confidence Interval |                                  |                            |                          |                                  |                            |                          |                                  |                            |                          |                                  |                            |                          |
| Stratifications based on the significant likelihood ratio test for interaction by race (p-interaction<0.0001) and sex (p-interaction<0.0001)                               |                                  |                            |                          |                                  |                            |                          |                                  |                            |                          |                                  |                            |                          |

| Table S3. Associations between Obese Status and Neighborhood Deprivation in those with insurance, among SCCS at baseline interview, 2002-2009                                                        |                                  |                       |                          |                                  |                       |                          |                                  |                       |                          |                                  |                       |                          |
|------------------------------------------------------------------------------------------------------------------------------------------------------------------------------------------------------|----------------------------------|-----------------------|--------------------------|----------------------------------|-----------------------|--------------------------|----------------------------------|-----------------------|--------------------------|----------------------------------|-----------------------|--------------------------|
|                                                                                                                                                                                                      | White                            |                       |                          |                                  |                       |                          | Black                            |                       |                          |                                  |                       |                          |
|                                                                                                                                                                                                      | Males                            |                       |                          | Females                          |                       |                          | Males                            |                       |                          | Females                          |                       |                          |
| Deprivation Index <sup>a</sup>                                                                                                                                                                       | N, "Healthy" weight <sup>b</sup> | N, Obese <sup>c</sup> | OR (95% CI) <sup>d</sup> | N, "Healthy" weight <sup>b</sup> | N, Obese <sup>c</sup> | OR (95% CI) <sup>d</sup> | N, "Healthy" weight <sup>b</sup> | N, Obese <sup>c</sup> | OR (95% CI) <sup>d</sup> | N, "Healthy" weight <sup>b</sup> | N, Obese <sup>c</sup> | OR (95% CI) <sup>d</sup> |
| Q1                                                                                                                                                                                                   | 355                              | 348                   | 1.0 (ref)                | 578                              | 496                   | 1.0 (ref)                | 123                              | 201                   | 1.0 (ref)                | 139                              | 453                   | 1.0 (ref)                |
| Q2                                                                                                                                                                                                   | 323                              | 510                   | 1.47<br>(1.18, 1.82)     | 584                              | 1021                  | 1.53<br>(1.29, 1.82)     | 233                              | 332                   | 0.91<br>(0.67, 1.23)     | 245                              | 888                   | 1.04<br>(0.82, 1.33)     |
| Q3                                                                                                                                                                                                   | 265                              | 507                   | 1.67<br>(1.33, 2.10)     | 505                              | 1025                  | 1.67<br>(1.40, 1.98)     | 263                              | 391                   | 1.04<br>(0.77, 1.41)     | 241                              | 1141                  | 1.42<br>(1.11, 1.81)     |
| Q4                                                                                                                                                                                                   | 335                              | 531                   | 1.45<br>(1.16, 1.82)     | 513                              | 1158                  | 1.69<br>(1.42, 2.02)     | 597                              | 805                   | 1.05<br>(0.80, 1.39)     | 503                              | 2563                  | 1.52<br>(1.22, 1.90)     |
| Q5                                                                                                                                                                                                   | 254                              | 303                   | 1.17<br>(0.91, 1.51)     | 268                              | 622                   | 1.67<br>(1.36, 2.05)     | 2401                             | 2136                  | 0.78<br>(0.60, 1.01)     | 1705                             | 6519                  | 1.24<br>(1.01, 1.53)     |
| <sup>a</sup> Neighborhood Deprivation Quintiles with Q1 being least deprived and Q5 being most deprived                                                                                              |                                  |                       |                          |                                  |                       |                          |                                  |                       |                          |                                  |                       |                          |
| <sup>b</sup> "Healthy" weight defined by having a BMI within [18.5, 24.9]                                                                                                                            |                                  |                       |                          |                                  |                       |                          |                                  |                       |                          |                                  |                       |                          |
| <sup>c</sup> Obese status defined by having a BMI $\geq$ 30                                                                                                                                          |                                  |                       |                          |                                  |                       |                          |                                  |                       |                          |                                  |                       |                          |
| <sup>d</sup> Analyses adjusted for age, education, household income, smoking status, and enrollment source with reference group those with "healthy" weight; OR=Odds Ratio; CI=Confidence Interval   |                                  |                       |                          |                                  |                       |                          |                                  |                       |                          |                                  |                       |                          |
| Stratifications based on the significant likelihood ratio test for interaction by race (p-interaction<0.0001), sex (p-interaction<0.0001), and insurance status in white males (p-interaction=0.009) |                                  |                       |                          |                                  |                       |                          |                                  |                       |                          |                                  |                       |                          |

| Table S4. Associations between Obese Status and Neighborhood Deprivation in those without insurance, among SCCS at baseline interview, 2002-2009                                                     |                                  |                       |                          |                                  |                       |                          |                                  |                       |                          |                                  |                       |                          |
|------------------------------------------------------------------------------------------------------------------------------------------------------------------------------------------------------|----------------------------------|-----------------------|--------------------------|----------------------------------|-----------------------|--------------------------|----------------------------------|-----------------------|--------------------------|----------------------------------|-----------------------|--------------------------|
|                                                                                                                                                                                                      | White                            |                       |                          |                                  |                       |                          | Black                            |                       |                          |                                  |                       |                          |
|                                                                                                                                                                                                      | Males                            |                       |                          | Females                          |                       |                          | Males                            |                       |                          | Females                          |                       |                          |
| Deprivation Index <sup>a</sup>                                                                                                                                                                       | N, "Healthy" weight <sup>b</sup> | N, Obese <sup>c</sup> | OR (95% CI) <sup>d</sup> | N, "Healthy" weight <sup>b</sup> | N, Obese <sup>c</sup> | OR (95% CI) <sup>d</sup> | N, "Healthy" weight <sup>b</sup> | N, Obese <sup>c</sup> | OR (95% CI) <sup>d</sup> | N, "Healthy" weight <sup>b</sup> | N, Obese <sup>c</sup> | OR (95% CI) <sup>d</sup> |
| Q1                                                                                                                                                                                                   | 110                              | 105                   | 1.0 (ref)                | 160                              | 224                   | 1.0 (ref)                | 112                              | 99                    | 1.0 (ref)                | 73                               | 242                   | 1.0 (ref)                |
| Q2                                                                                                                                                                                                   | 178                              | 249                   | 1.62<br>(1.13, 2.32)     | 299                              | 603                   | 1.47<br>(1.13, 1.91)     | 192                              | 154                   | 0.90<br>(0.62, 1.31)     | 138                              | 450                   | 1.04<br>(0.74, 1.45)     |
| Q3                                                                                                                                                                                                   | 223                              | 215                   | 1.10<br>(0.77, 1.58)     | 302                              | 618                   | 1.73<br>(1.33, 2.24)     | 316                              | 254                   | 1.03<br>(0.73, 1.45)     | 140                              | 646                   | 1.46<br>(1.05, 2.04)     |
| Q4                                                                                                                                                                                                   | 224                              | 250                   | 1.22<br>(0.85, 1.73)     | 299                              | 687                   | 1.74<br>(1.34, 2.26)     | 591                              | 441                   | 0.92<br>(0.67, 1.28)     | 341                              | 1348                  | 1.27<br>(0.94, 1.71)     |
| Q5                                                                                                                                                                                                   | 322                              | 211                   | 0.81<br>(0.57, 1.15)     | 230                              | 417                   | 1.49<br>(1.13, 1.96)     | 2881                             | 1562                  | 0.73<br>(0.54, 0.98)     | 1325                             | 3722                  | 1.01<br>(0.76, 1.34)     |
| <sup>a</sup> Neighborhood Deprivation Quintiles with Q1 being least deprived and Q5 being most deprived                                                                                              |                                  |                       |                          |                                  |                       |                          |                                  |                       |                          |                                  |                       |                          |
| <sup>b</sup> "Healthy" weight defined by having a BMI within [18.5, 24.9]                                                                                                                            |                                  |                       |                          |                                  |                       |                          |                                  |                       |                          |                                  |                       |                          |
| <sup>c</sup> Obese status defined by having a BMI $\geq$ 30                                                                                                                                          |                                  |                       |                          |                                  |                       |                          |                                  |                       |                          |                                  |                       |                          |
| <sup>d</sup> Analyses adjusted for age, education, household income, smoking status, and enrollment source with reference group those with "healthy" weight; OR=Odds Ratio; CI=Confidence Interval   |                                  |                       |                          |                                  |                       |                          |                                  |                       |                          |                                  |                       |                          |
| Stratifications based on the significant likelihood ratio test for interaction by race (p-interaction<0.0001), sex (p-interaction<0.0001), and insurance status in white males (p-interaction=0.009) |                                  |                       |                          |                                  |                       |                          |                                  |                       |                          |                                  |                       |                          |

| Table S5. Associations between Obese Status and Neighborhood Deprivation in those with household income <\$50,000, among SCCS at baseline interview, 2002-2009                                         |                                  |                       |                          |                                  |                       |                          |                                  |                       |                          |                                  |                       |                          |
|--------------------------------------------------------------------------------------------------------------------------------------------------------------------------------------------------------|----------------------------------|-----------------------|--------------------------|----------------------------------|-----------------------|--------------------------|----------------------------------|-----------------------|--------------------------|----------------------------------|-----------------------|--------------------------|
|                                                                                                                                                                                                        | White                            |                       |                          |                                  |                       |                          | Black                            |                       |                          |                                  |                       |                          |
|                                                                                                                                                                                                        | Males                            |                       |                          | Females                          |                       |                          | Males                            |                       |                          | Females                          |                       |                          |
| Deprivation Index <sup>a</sup>                                                                                                                                                                         | N, "Healthy" weight <sup>b</sup> | N, Obese <sup>c</sup> | OR (95% CI) <sup>d</sup> | N, "Healthy" weight <sup>b</sup> | N, Obese <sup>c</sup> | OR (95% CI) <sup>d</sup> | N, "Healthy" weight <sup>b</sup> | N, Obese <sup>c</sup> | OR (95% CI) <sup>d</sup> | N, "Healthy" weight <sup>b</sup> | N, Obese <sup>c</sup> | OR (95% CI) <sup>d</sup> |
| Q1                                                                                                                                                                                                     | 239                              | 245                   | 1.0 (ref)                | 406                              | 530                   | 1.0 (ref)                | 200                              | 209                   | 1.0 (ref)                | 156                              | 569                   | 1.0 (ref)                |
| Q2                                                                                                                                                                                                     | 383                              | 572                   | 1.47<br>(1.16, 1.87)     | 687                              | 1419                  | 1.54<br>(1.30, 1.81)     | 391                              | 380                   | 0.84<br>(0.65, 1.09)     | 336                              | 1216                  | 0.98<br>(0.79, 1.22)     |
| Q3                                                                                                                                                                                                     | 407                              | 601                   | 1.40<br>(1.11, 1.77)     | 689                              | 1566                  | 1.72<br>(1.46, 2.03)     | 557                              | 570                   | 0.98<br>(0.77, 1.25)     | 357                              | 1672                  | 1.29<br>(1.04, 1.61)     |
| Q4                                                                                                                                                                                                     | 493                              | 682                   | 1.34<br>(1.06, 1.68)     | 706                              | 1732                  | 1.81<br>(1.53, 2.13)     | 1145                             | 1122                  | 0.92<br>(0.73, 1.15)     | 802                              | 3742                  | 1.29<br>(1.06, 1.57)     |
| Q5                                                                                                                                                                                                     | 543                              | 459                   | 0.94<br>(0.74, 1.19)     | 461                              | 989                   | 1.68<br>(1.40, 2.01)     | 5191                             | 3532                  | 0.68<br>(0.55, 0.84)     | 2980                             | 9977                  | 1.02<br>(0.85, 1.24)     |
| <sup>a</sup> Neighborhood Deprivation Quintiles with Q1 being least deprived and Q5 being most deprived                                                                                                |                                  |                       |                          |                                  |                       |                          |                                  |                       |                          |                                  |                       |                          |
| <sup>b</sup> "Healthy" weight defined by having a BMI within [18.5, 24.9]                                                                                                                              |                                  |                       |                          |                                  |                       |                          |                                  |                       |                          |                                  |                       |                          |
| <sup>c</sup> Obese status defined by having a BMI ≥ 30                                                                                                                                                 |                                  |                       |                          |                                  |                       |                          |                                  |                       |                          |                                  |                       |                          |
| <sup>d</sup> Analyses adjusted for age, education, household income, smoking status, and enrollment source with reference group those with "healthy" weight; OR=Odds Ratio; CI=Confidence Interval     |                                  |                       |                          |                                  |                       |                          |                                  |                       |                          |                                  |                       |                          |
| Stratifications based on the significant likelihood ratio test for interaction by race (p-interaction<0.0001), sex (p-interaction<0.0001), and household income in black females (p-interaction=0.001) |                                  |                       |                          |                                  |                       |                          |                                  |                       |                          |                                  |                       |                          |

| Table S6. Associations between Obese Status and Neighborhood Deprivation in those with household income ≥\$50,000, among SCCS at baseline interview, 2002-2009                                         |                                  |                       |                          |                                  |                       |                          |                                  |                       |                          |                                  |                       |                          |
|--------------------------------------------------------------------------------------------------------------------------------------------------------------------------------------------------------|----------------------------------|-----------------------|--------------------------|----------------------------------|-----------------------|--------------------------|----------------------------------|-----------------------|--------------------------|----------------------------------|-----------------------|--------------------------|
|                                                                                                                                                                                                        | White                            |                       |                          |                                  |                       |                          | Black                            |                       |                          |                                  |                       |                          |
|                                                                                                                                                                                                        | Males                            |                       |                          | Females                          |                       |                          | Males                            |                       |                          | Females                          |                       |                          |
| Deprivation Index <sup>a</sup>                                                                                                                                                                         | N, "Healthy" weight <sup>b</sup> | N, Obese <sup>c</sup> | OR (95% CI) <sup>d</sup> | N, "Healthy" weight <sup>b</sup> | N, Obese <sup>c</sup> | OR (95% CI) <sup>d</sup> | N, "Healthy" weight <sup>b</sup> | N, Obese <sup>c</sup> | OR (95% CI) <sup>d</sup> | N, "Healthy" weight <sup>b</sup> | N, Obese <sup>c</sup> | OR (95% CI) <sup>d</sup> |
| Q1                                                                                                                                                                                                     | 226                              | 208                   | 1.0 (ref)                | 332                              | 190                   | 1.0 (ref)                | 35                               | 91                    | 1.0 (ref)                | 56                               | 126                   | 1.0 (ref)                |
| Q2                                                                                                                                                                                                     | 118                              | 187                   | 1.63<br>(1.20, 2.21)     | 196                              | 205                   | 1.57<br>(1.19, 2.07)     | 34                               | 106                   | 1.22<br>(0.69, 2.17)     | 47                               | 122                   | 1.12<br>(0.70, 1.80)     |
| Q3                                                                                                                                                                                                     | 81                               | 121                   | 1.38<br>(0.97, 1.97)     | 118                              | 140                   | 1.85<br>(1.35, 2.54)     | 22                               | 75                    | 1.44<br>(0.75, 2.74)     | 24                               | 115                   | 2.20<br>(1.26, 3.83)     |
| Q4                                                                                                                                                                                                     | 66                               | 99                    | 1.39<br>(0.95, 2.04)     | 106                              | 113                   | 1.59<br>(1.14, 2.22)     | 43                               | 124                   | 1.40<br>(0.80, 2.44)     | 42                               | 169                   | 1.83<br>(1.14, 2.94)     |
| Q5                                                                                                                                                                                                     | 33                               | 55                    | 1.58<br>(0.97, 2.56)     | 37                               | 50                    | 1.85<br>(1.15, 3.01)     | 91                               | 166                   | 0.80<br>(0.49, 1.33)     | 50                               | 264                   | 2.63<br>(1.66, 4.15)     |
| <sup>a</sup> Neighborhood Deprivation Quintiles with Q1 being least deprived and Q5 being most deprived                                                                                                |                                  |                       |                          |                                  |                       |                          |                                  |                       |                          |                                  |                       |                          |
| <sup>b</sup> "Healthy" weight defined by having a BMI within [18.5, 24.9]                                                                                                                              |                                  |                       |                          |                                  |                       |                          |                                  |                       |                          |                                  |                       |                          |
| <sup>c</sup> Obese status defined by having a BMI ≥ 30                                                                                                                                                 |                                  |                       |                          |                                  |                       |                          |                                  |                       |                          |                                  |                       |                          |
| <sup>d</sup> Analyses adjusted for age, education, household income, smoking status, and enrollment source with reference group those with "healthy" weight; OR=Odds Ratio; CI=Confidence Interval     |                                  |                       |                          |                                  |                       |                          |                                  |                       |                          |                                  |                       |                          |
| Stratifications based on the significant likelihood ratio test for interaction by race (p-interaction<0.0001), sex (p-interaction<0.0001), and household income in black females (p-interaction=0.001) |                                  |                       |                          |                                  |                       |                          |                                  |                       |                          |                                  |                       |                          |
